# Sex-specific responses of tree-ring growth to climate in the dioecious tree *Populus cathayana*

Kechao Huang<sup>1,2</sup>, Yongmei Liao<sup>1</sup>, Tingfa Dong<sup>1</sup>,  
Yanxia Yang<sup>1</sup>, Jundong He<sup>1</sup>, Huihui Huan<sup>1</sup>,  
Qibing Zhang<sup>3</sup> and Xiao Xu<sup>1,4,\*</sup>

<sup>1</sup> Key Laboratory of Southwest China Wildlife Resources Conservation, China West Normal University, Ministry of Education, No. 1 Shida Road, Nanchong, Sichuan 637009, China

<sup>2</sup> Guangxi Institute of Botany, Chinese Academy of Sciences, Guilin, No. 85 Yanshan Street, Yanshan District, Guangxi 541006, China

<sup>3</sup> State Key Laboratory of Vegetation and Environmental Change, Institute of Botany, Chinese Academy of Sciences, No. 20 Nanxincun, Xiangshan, Beijing 100093, China

<sup>4</sup> College of Grassland, Resources and Environment, Inner Mongolia Agricultural University, No. 306 ZhaoWu Da Road, Saihan District, Hohhot 010018, China

\*Correspondence address. Xiao Xu, College of Life Science, China West Normal University, No.1 Shida Road, Nanhong 637009, P.R. China; Tel: +86-0817-2568318; E-mail: xuxiao\_cwnu@163.com

## Abstract

### Aims

Radial growth in response to climate has been reported in many trees, but the sex-specific responses of tree-ring growth associated with altitude in dioecious trees are still poorly known. This study aims to examine whether (i) there are sex-related responses of tree-ring growth to climate in dioecious trees; (ii) these responses could be changed with altitude elevation.

### Methods

The tree-ring width and basal area increment (BAI) were measured over the past 30 years (1982–2011), and the sexual differences in relationship between BAI and time span and correlations between ring width and climatic factors were investigated in *Populus cathayana* trees at two altitude sites (1,450 m and 1,750 m a.s.l.) in Xiaowutai Mountain, Hebei, north China.

### Important Findings

The BAI was increased over the past 30 years. Trees at high-altitude sites had significantly lower mean ring width and mean BAI than

those trees at low-altitude sites ( $P < 0.001$ ). In addition, sexual differences in tree-ring growth and its response to climate were more pronounced by altitude elevation. Male trees had a significantly larger mean ring width and mean BAI than did females at high-altitude sites, whereas no significant sexual differences in these traits were detected at low-altitude sites. Female trees were sensitive to previous October–November temperatures at high altitude but to current February and April precipitation at low altitude ( $P < 0.05$ ), whereas male trees were sensitive to current June temperature at high altitude but to January precipitation at low altitude ( $P < 0.05$ ). Our results indicated that the responses of tree-ring growth to climate are sex dependent and can be changed with altitude elevation.

**Keywords:** altitude, basal area increment (BAI), dendroclimatology, dioecious, *Populus cathayana* and ring width

Received: 19 October 2016, Revised: 9 July 2017,

Accepted: 24 August 2017

## INTRODUCTION

The responses of tree-ring growth to climate factors, such as temperature, precipitation and their interactions have attracted widespread attention (Bräuning *et al.* 2004; Briffa *et al.* 1998; Büntgen *et al.* 2011; Esper *et al.* 2002; Frank *et al.* 2005; Körner and Basler 2010). For example, ring width was reported to be positively correlated with temperature in *Pinus*

*sylvestris* (Grace and Norton 1990) and was strongly increased by previous August rainfall in *Abies alba* in the internal Alps (Rolland 1993). In central Canada, ring width was promoted by a cooler and wetter climate in black spruce (*Picea mariana*), while it was enhanced by higher temperature and spring precipitation in jack pine (*Pinus banksiana*) (Brooks *et al.* 1998). Additionally, ring width was reported to be increased by warm autumn or winter in *A. alba*, *Pinus nigra*, *P. sylvestris* and *P.*

*uncinata* in Mediterranean mountains (Lebourgeois *et al.* 2012). As another character of tree-ring growth, tree-ring density was also reported to be affected by summer temperature in *Abies lasiocarpa* in British Columbia (Splechtina *et al.* 2000) or in *Picea brachytyla* in the central Hengduan Mountains of southern China (Fan *et al.* 2009). Moreover, tree-ring maximum density was positively correlated with mean temperature of August and September in Balfour spruce (*Picea likiangensis* var. *balfouriana*) in eastern Tibet of China (Wang *et al.* 2010), whereas it was closely related with temperature during whole growing season in white spruce (*Picea glauca*) in the highlands of southeastern New York (D'Arrigo *et al.* 1992). Although above-mentioned studies have confirmed the close relationship between tree-ring growth and climate, knowledge about sexual differences in tree-ring growth in response to climatic factors is still limited.

As an important component of terrestrial ecosystems, dioecious plants account for nearly 6% of all angiosperm species (Renner and Ricklefs 1995). Since attention has been paid to these plants in recent years, sexual differences in adaptive capacity have been widely studied in plants *Populus cathayana*, *P. tremuloides*, *P. yunnanensis*, *Salix arctica*, *S. myrsinifolia*, *Silene latifolia* and so on (e.g. Chen *et al.* 2014; Dong *et al.* 2017; Jones *et al.* 1999; Nybakken and Julkunen-Tiitto 2013; Randriamanana *et al.* 2015; Wang and Curtis 2001; Wang and Griffin 2003; Xu *et al.* 2008, 2010). In general, male trees were reported to possess higher adaptive capacity than females under drought, elevated CO<sub>2</sub>, enhanced UV-B, higher temperatures, or combinations because of few reproductive inputs (Chen *et al.* 2016; Xu *et al.* 2008, 2010; Zhao *et al.* 2012). However, little attention has been paid to sex-specific tree-ring growth (except for Ariel and Alejandro 2016; Gao *et al.* 2010; Olano *et al.* 2015; Rozas *et al.* 2009).

Altitude is a geographic factor associated with temperature, precipitation, light and soil (He *et al.* 2017; Jin *et al.* 2016; Kienast *et al.* 1987; Körner 2007; Mai *et al.* 2017). Although most studies demonstrated the tree-ring growth and its responses to climatic factors could be affected by altitude (Liang *et al.* 2010; Lloyd *et al.* 2011; Splechtina *et al.* 2000; Wang *et al.* 2005; Zhang and Hebda 2004), few studies focused on the gender-related differences in responses of trees to climate change. Since males could display higher adaptive capacity than females under

environmental stress (Li *et al.* 2014; Xu *et al.* 2008, 2010; Zhao *et al.* 2012), we hypothesized that sex-specific responses of tree-ring growth to climate would be changed with altitude elevation, and sexual differences in such responses are more pronounced at high-altitude sites because of a harsh environment (e.g. low temperature, strong UV-B radiation or poor soil). To test our hypothesis, *Populus cathayana* Rehd., a dioecious woody tree which is widely distributed in northern, central and southwestern China was chosen, and sexual differences in tree-ring width, basal area increment (BAI), scaling relationship between BAI and time (which is a index to test for a common slope or elevation among lines fitted to different groups), as well as the correlations between tree ring growth and climatic factors were investigated in the study.

## MATERIALS AND METHODS

### Study area and sampling

Study area was located in the Xijin Valley of the Xiaowutai Mountain Nature Reserve in Hebei, China (39°50'–40°07'N, 114°47'–115°30'E). This site is characterized by a warm-temperate continental monsoon climate, which has an average annual temperature of 5.5°C (–12.0°C in January and 19.5°C in July) and a mean annual precipitation of 628 mm (climate data acquired from <http://www.meteoblue.com>). Soil types are classified as alfisols, aridisols and inceptisols (Yu *et al.* 2002). The forest vegetation is dominated by species in the *Acer*, *Tilia*, *Betula*, *Corylus*, *Quercus*, *Ulmus*, *Populus* and *Cerasus* genera. *P. cathayana* is a dominant tree species in valleys and is widely distributed between 1,400–1,700 m a.s.l. (Yang *et al.* 2015).

Two sampling sites were established at 1,450 and 1,750 m a.s.l. along the Xijin River Valley in the middle of April (the beginning of the *P. cathayana* flowering season). Seventy mature trees (35 males and 35 females) with 30 to 45-cm diameter at breast height (~50 years old) were randomly selected for collecting tree-core samples at each site. The increment cores were taken at breast height (1.3 m) from each tree using an increment borer (length 600 mm, diameter 4.35 mm) (Increment Borer, Haglof, Langsele, Sweden). Poor-quality sample cores (such as pith missed, decay, erosion or broken pieces) were removed from further analyses. Descriptive statistics for tree-ring samples were listed in Table 1.

**Table 1:** descriptive statistics for tree-ring samples of female and male *Populus cathayana*

| Sex                                | Low altitude |             | High altitude |             |
|------------------------------------|--------------|-------------|---------------|-------------|
|                                    | Female       | Male        | Female        | Male        |
| No. of sample trees                | 35           | 35          | 35            | 35          |
| Sample size                        | 35           | 35          | 35            | 35          |
| Chronology duration                | 1965–2011    | 1963–2011   | 1960–2011     | 1959–2011   |
| Time span (a)                      | 47           | 49          | 52            | 53          |
| Common period                      | 1982–2011    | 1982–2011   | 1982–2011     | 1982–2011   |
| No. of samples in common period    | 25           | 21          | 35            | 35          |
| Diameter (cm) (1.3 m above ground) | 37.5 ± 2.1b  | 38.5 ± 1.7b | 37.5 ± 1.5b   | 43.4 ± 1.5a |

Means with different letters are significantly different at the 0.05 level (Duncan's multiple range test).

## Tree-ring width measurement

Following the method described by Cook and Kairiukstis (1990), 140 core samples were dried for 1 week at room temperature, and then glued onto wooden core holders and polished with a sanding machine until the cellular structure of the xylem was clearly visible. A Lintab 5 measuring system (Rinntech, Heidelberg, Germany) and COFECHA software (Holmes 1983) were used to measure tree-ring width (to the nearest 0.001 mm) and control the cross-matching quality of the different series, respectively. Additionally, BAI was calculated according to the formula  $ARA_t = \pi (R_t^2 - R_{t-1}^2)$  described by Biondi and Qeadan (2008), where  $R_t$  is the stem radius at the end of the annual increment, and  $R_{t-1}$  is the stem radius at the beginning of the annual increment.

## Chronology construction

The residual chronology was applied to the climate-growth response analysis. To remove non-climatic factors (e.g. age), each series was fitted to a spline function with a 50 % frequency response of 30 years using the ARSTAN programme (Cook and Holmes 1996). Chronologies for the common period of 1982–2011 were compared and the inter-series correlation was calculated using a 20-year moving window with a 10-year overlap. The standard deviation (SD), mean sensitivity (MS), mean correlations among cores (R), signal-to-noise ratio (SNR), expressed population signal (EPS) and explained variance of the first eigenvector (PCI) were subsequently calculated. Moreover, monthly mean temperature and total precipitation data for the period 1982–2011 were collected from the local meteorological station which is located ~20 km northwest of the sampling sites. These data were used for calculating correlation coefficients between climatic factors and tree-ring chronology because of the dramatic climate changes in this period in China (Zhang et al. 2013).

## Data analysis

Dendroclimatic analysis was performed with the DendroClim2002 software package and 1000 bootstrapped samples were used to compute response and correlation coefficients (Biondi and Waikul 2004; Zhang et al. 2003). These correlation analyses were conducted from September of the previous year to October of the current year, and significance was set at the  $P < 0.05$  level.

Scaling relationships between BAI and time span were analyzed by using the SMATR version 2.0 (Falster et al. 2006). Confidence intervals for individual regression slopes were calculated according to Pitman (1939), and heterogeneity of regression slopes (used to test whether the slopes are significantly different) between the sexes and common slopes (used to test whether the fitted slopes share a common elevation) were calculated followed Warton and Weber (2002).

Statistical analyses were performed using the SPSS 19.0 for Windows statistical software package (IBM Corp., New York, USA). Data were checked for normality and homogeneity of variances, and log-transformed to correct deviations from

these assumptions when needed. Stepwise linear regressions were used to characterize trends in annual mean temperature and annual precipitation over the 1982–2011 period. One-way analyses of variance (ANOVAs) were used to determine differences in tree-ring width between the sexes or altitude sites. Duncan's multiple range tests were used to detect differences among means. Two-way ANOVAs were used to assess the effects of sex, altitude and their interactive effects. Differences were considered significant at  $P < 0.05$  level.

## RESULTS

### Trends in annual mean temperature and annual precipitation

Annual precipitation was fluctuating during the period of 1982–2011, and no significant change was found ( $R^2 = 0.057$ ,  $P = 0.217$ ) (Fig. 1). However, annual mean air temperature significantly increased from 6.5°C to 8.3°C over the past 30 years ( $R^2 = 0.560$ ,  $P < 0.001$ ), indicating a warming trend in this region (Fig. 1).

### Sexual difference in relationships between BAI and time span at high- and low-altitude sites

During the period of 1982–2011, BAI was observed to be inconsistent with an upward fluctuation, and this trend was more pronounced at low-altitude site (Fig. 2a). Additionally, male trees had greater BAI than females at high-altitude site (Fig. 2a). On the other hand, for two sexes, BAI was positively correlated with time span at both high- and low-altitude sites. Females have common slopes of 0.746 and 0.629 with males at high- and low-altitude sites, respectively (Table 2; Fig. 2b). Moreover, a significant shift in the  $y$ -intercept was found between the sexes ( $P = 0.001$ ) and male trees exhibited larger value than females at high-altitude sites (Table 2; Fig. 2b), suggesting that the males had larger BAI per unit time span

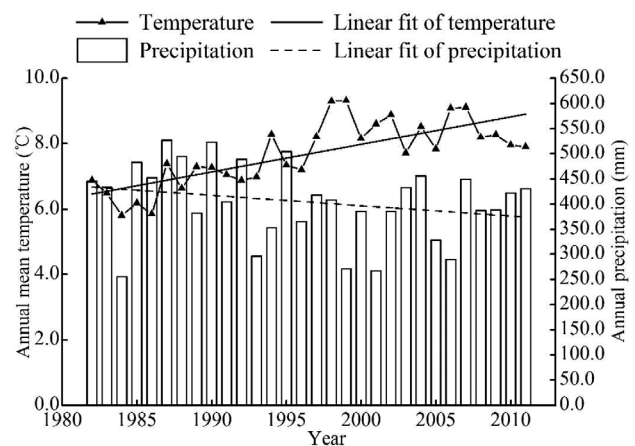

**Figure 1:** distribution of annual precipitation (bars) and mean air temperature (line with triangles) and fit line of annual precipitation (dotted line) and fit line of annual air temperature (solid line) during the period of 1982–2011 at the Yuxian Meteorological Station, China.

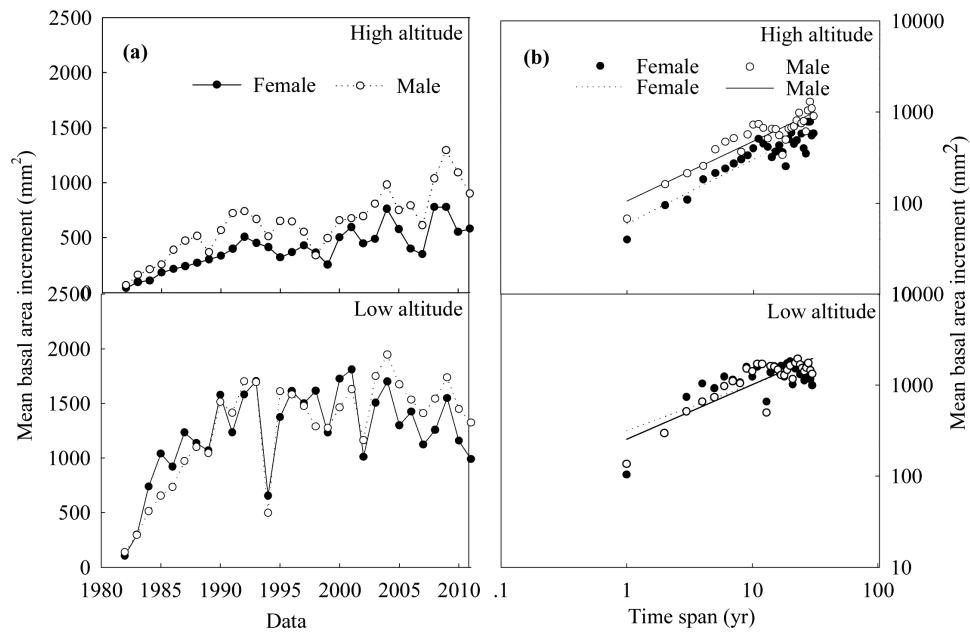

**Figure 2:** (a) The basal area increment (BAI) series between the sexes during the period of 1982–2011 and (b) scaling relationships between BAI and time span of male and female *Populus cathayana* at high- and low-altitude sites in the Xiaowutai Mountains.

**Table 2:** standardized major axis common slopes, 95% confidence intervals (CIs) (for the sexes) and SMA regression parameters between basal area increment (BAI) and time span from female and male *Populus cathayana* trees

| $y-x$         | Sex    | Slope | $r^2$    | $y$ -intercept | $P_{(\text{slope})}$ | Common slope | CIs         | $P_{(y\text{-intercept})}$ |
|---------------|--------|-------|----------|----------------|----------------------|--------------|-------------|----------------------------|
| High altitude | Female | 0.766 | 0.849*** | 1.731          | 0.621 ns             | 0.746        | 0.669–0.831 | 0.001***                   |
|               | Male   | 0.723 | 0.824*** | 1.926          |                      |              |             |                            |
| Low altitude  | Female | 0.680 | 0.559*** | 2.300          | 0.847 ns             | 0.692        | 0.593–0.808 | 0.923 ns                   |
|               | Male   | 0.700 | 0.732*** | 2.304          |                      |              |             |                            |

$P_{(\text{slope})}$ , level of significance testing for slope;  $P_{(y\text{-intercept})}$ , level of significance testing for  $y$ -intercept between genders;  $r^2$ , correlation coefficients. The significance values of analyses are denoted as: ns, not significant; \*\*\* $P < 0.001$ .

than the females. However, similar result was not found at low-altitude sites (Table 2; Fig. 2b).

### Sexual difference in mean ring width and mean BAI at low- and high-altitude sites

The tree-ring growth was significantly affected by altitude. Compared with low-altitude trees, high-altitude trees had significantly smaller mean ring width and mean BAI in both males and females ( $P < 0.001$ ) (Fig. 3). Furthermore, sexual difference in tree-ring growth was induced by altitude elevation, and male trees exhibited significant larger mean ring width and mean BAI than females at high-altitude sites ( $P = 0.032$  and  $0.043$ , respectively), whereas no significant sexual differences in these traits were detected at low-altitude sites (Fig. 3)

### Sexual differences in chronological characteristics at high- and low-altitude sites

Compared with chronologies of low-altitude trees, high-altitude trees exhibited relatively lower SD and MSs but higher

SNR and EPS. On the other hand, male trees had lower SD but higher MS, SNR and EPS than females at high-altitude sites, whereas the opposite results were observed at low-altitude sites (Table 3). However, the mean correlations among all cores (R) and the variance in the first eigenvector (%) were always greater in male trees regardless of altitude (Table 3).

### Sexual differences in climate responses at high- and low-altitude sites

Ring width was negatively correlated with previous October–November temperatures in females but with current June temperature in males at high-altitude sites ( $P < 0.05$ ), whereas it was negatively correlated with current January and August temperatures in female, but only with current January temperature in males at low-altitude sites (Fig. 4a).

Furthermore, ring width was positively correlated with current February and April precipitation in females but with current January precipitation in males at low-altitude sites ( $P < 0.05$ ). However, no significant correlations were found



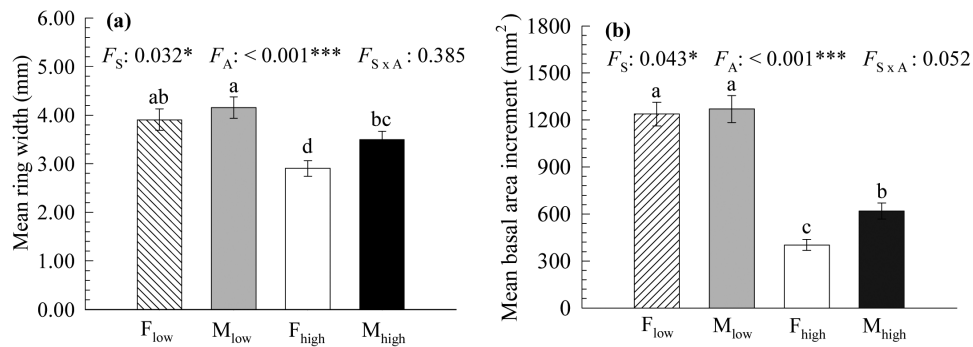

**Figure 3:** (a) Mean ring width and (b) mean basal area increment (BAI) of male and female *Populus cathayana* trees at low- and high-altitude sites in the Xiaowutai Mountains. The values are expressed as the means  $\pm$  SE ( $n = 35$ ). Different letters above the bars denote statistically significant differences between sexes and altitudes at  $P < 0.05$  based on Duncan's multiple range test. Abbreviations:  $F_A$ , altitude effect;  $F_S$ , sex effect;  $F_{S \times A}$ , the interactive effect of sex and altitude.  $F_{high}$  or  $M_{high}$ , female or male at high-altitude sites;  $F_{low}$  or  $M_{low}$ , female or male at low-altitude sites.

**Table 3:** statistical characteristics of the residual chronology of female and male *Populus cathayana* trees (1982–2011)

| Statistical item                            | Low altitude |       | High altitude |        |
|---------------------------------------------|--------------|-------|---------------|--------|
|                                             | Female       | Male  | Female        | Male   |
| Standard deviation (SD)                     | 0.208        | 0.169 | 0.191         | 0.186  |
| Mean sensitivity (MS)                       | 0.257        | 0.212 | 0.207         | 0.210  |
| Mean correlations among all cores (R)       | 0.264        | 0.277 | 0.238         | 0.350  |
| Signal-to-noise ratio (SNR)                 | 8.960        | 8.028 | 10.928        | 18.890 |
| Expressed population signal (EPS)           | 0.900        | 0.889 | 0.916         | 0.950  |
| Variance in the first eigenvector (%) (PCI) | 31.5         | 32.4  | 29.6          | 39.9   |

between ring width and precipitation for either males or females at high-altitude sites (Fig. 4b).

## DISCUSSION

In this study, we determined that annual mean temperature in the Xiaowutai Mountains had increased by an average of 1.8°C over the past 30 years (Fig. 1). The warming trend is consistent with the prediction of Intergovernmental Panel on Climate Change (IPCC) that annual mean temperatures are likely to increase by 1.5–4.0°C in continental areas of the Northern Hemisphere by the end of the 21st century (Stocker 2014). As a result, the growth of trees would be promoted by warming because of the enhanced enzyme activity and the extended duration of favourable temperatures (Chmura et al. 2011; Luong et al. 2013). As we predicted, BAI of *P. cathayana* trees significantly increased during the period of 1982–2011 (Fig. 2). Similar results that warming accelerates tree growth were also reported in tree species *Abies fargesii*, *A. chensiensis*, *Cryptomeria japonica*, *Larix chinensis*, *Pinus densiflora*, *P. ponderosa*, *P. tabulaeformis*, *Pseudotsuga menziesii*, *Quercus alba* and *Tsuga canadensis* in North America, Northwest China and South Korea (Black et al. 2008; Liu et al. 2013; Luong et al. 2013).

In addition to warming, altitude is another factor to affect tree-ring growth (He et al. 2013; Lv and Zhang 2012;

Splechtina et al. 2000; Zhang and Wilmking 2010). A change in altitude is associated with a change in temperature, precipitation, soil, light, humid as well as UV-B radiation. The precipitation generally increases with altitude elevation, whereas temperature decreases with elevation. In our study, *P. cathayana* trees displayed a significantly smaller mean ring width and mean BAI at high-altitude sites ( $P < 0.001$ ; Fig. 3). In general, trees at high-altitude sites are usually subjected to a colder, humid and strong UV-B radiation environment, and have a lower growth rate and shorter growth season (Peng et al. 2008). Therefore, tree-ring growth is negatively correlated with altitude elevation. Similar results were reported for trees in the Qilian, Anyemaqen, Emei and Sygera mountain ranges, as well as for trees in the southern part of the Qinghai-Tibet Plateau in China (e.g. Fang et al. 2010; Gou et al. 2005; Liang et al. 2010; Liu et al. 2013; Peng et al. 2008). Moreover, we found that radial growth was significantly negatively correlated with mean January temperature at low altitude, but it was not found at high altitude (Fig. 4a). It seems that there exist different growth sensitivities to temperature between high- and low-altitude trees. Since most deciduous trees require a specific minimum winter temperature to break dormancy (Faust et al. 1997), warmer winter temperature would be detrimental to dormancy and early-spring sprouting of trees, especially at low-altitude sites in the Northern Hemisphere (D'Arrigo et al. 2001; Wang et al.

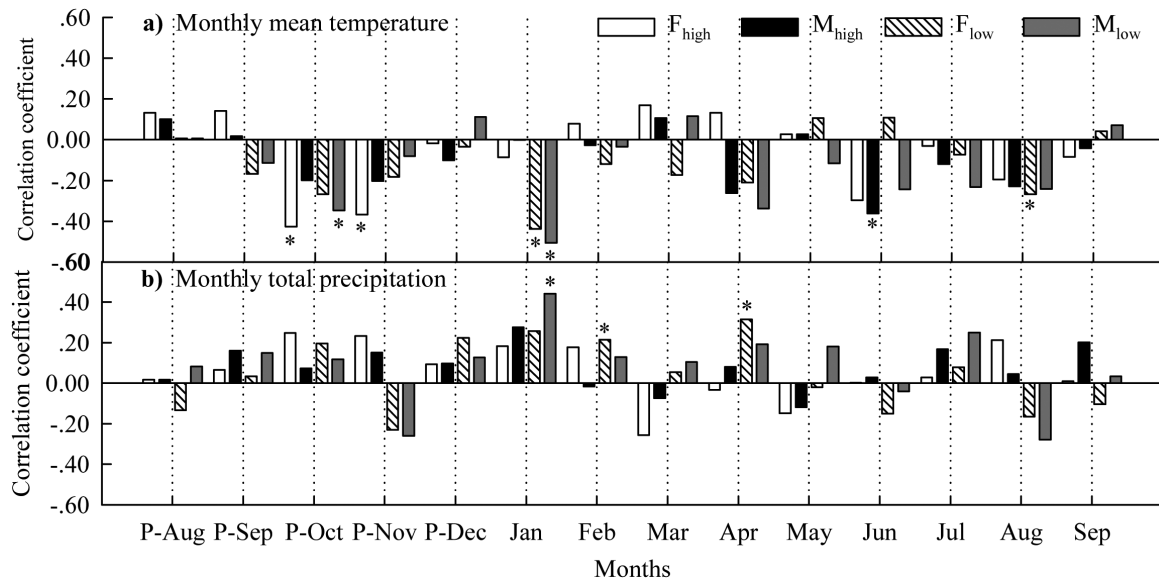

**Figure 4:** correlation coefficients between residual chronologies and (a) monthly mean temperatures and (b) monthly total precipitation during the period of 1982–2011. In the figure, P-August–September refers to the previous August to the current September, and the asterisk indicates a 0.05 significance level. F<sub>high</sub> or M<sub>high</sub>: female or male at high-altitude sites; F<sub>low</sub> or M<sub>low</sub>: female or male at low-altitude sites.

2005). Simultaneously, results of residual chronology analysis also showed that ring width chronologies from low-altitude trees had relatively higher MS and lower SNR than chronologies from high-altitude trees (Table 3).

On the other hand, the result of Duncan's multiple range tests showed that male trees had significantly wider mean ring width and more mean BAI than females at high-altitude sites ( $P = 0.032$  and  $0.043$ , respectively), whereas no significant differences between two sexes were detected at low-altitude sites (Fig. 3). It suggested that sexual differences in tree-ring growth were enlarged by increasing altitude. Previous studies reported that male and female *P. cathayana* individuals had different adaptive capability under environmental stress (Chen *et al.* 2010, 2016; Li *et al.* 2014); Xu *et al.* 2008, 2010; Zhang *et al.* 2011). For example, chilling-stressed males exhibited a better chloroplast structure and higher osmotic adjustment substance contents than females (Zhang *et al.* 2011). Drought-stressed males had higher photosynthetic ability than females (Xu *et al.* 2008). UV-B radiation-stressed males had a more efficient antioxidant system and higher anthocyanin content to alleviate UV-B penetration stress than females (Xu *et al.* 2010). Under nitrogen or phosphorus deficit environment, females suffered more negative effects on photosynthesis, organelle ultrastructures and nitrogen metabolic processes than did males (Zhang *et al.* 2014). According to Zhang *et al.* (2016), sexual differences in adaptive capability are the result of abundant sex-specifically expressed proteins, which involved with photosynthesis, carbohydrate metabolism, lipid metabolism, secondary metabolism, oxidation reduction, signal transduction, as well as gene expression regulation. Female plants usually express fewer proteins than males under environmental stress, which results in a weak adaptive

capability (Zhang *et al.* 2016). Hence, with the increasing of altitude, habitat is gradually replaced by a stress environment with cold air, infertile soil and higher UV-B radiation. Male *P. cathayana* trees would be induced to express more functional proteins than females to adapt stress environment, and result in a wider ring width and more BAI at high-altitude sites.

The phenomenon that the sensitivity of tree-ring variability to climate is sex dependent has been reported in dioecious plants *Araucaria araucana*, *Fraxinus mandshurica*, *Juniperus communis*, *J. thurifera*, *Populus tremuloides* and *Taxus baccata* (Ariel and Alejandro 2016; Cedro *et al.* 2011; Gao *et al.* 2010; Grant and Mitton 1979; Iszkuło and Boratyński 2011; Iszkuło *et al.* 2011; Olano *et al.* 2015). For instance, female *F. mandshurica* and *J. communis* trees were sensitive to precipitation, whereas males were sensitive to previous November temperature (Gao *et al.* 2010; Iszkuło and Boratyński 2011). Female *J. thurifera* trees were more sensitive to summer water stress and displayed stronger ring-width responses than males (Olano *et al.* 2015; Rozas *et al.* 2009). Female *A. araucana* trees are more sensitive to air surface temperature but males appear to be more sensitive to precipitation (Ariel and Alejandro 2016). To our knowledge, dioecious plants may evolve alternative optimal strategies to maximize reproductive success when resources are limited (Charnov 1982) and females usually invest more resources into reproduction and less into growth than do males (Delph 1990; Cipollini and Whigham 1994), which would result in different strategies between two sexes for the acquiring and deploying resources (Sánchez Vilas and Pannell 2011), such as females substantial demand carbon and water for the production of flowers, seeds and fruits, while males particularly require nitrogen and phosphorus for production of pollen (Ashman

1994; Bloom *et al.* 1985; Obeso 2002). As a result, sexual dimorphism in resource acquirement and investment would lead to different growth strategies in response to climate factors between two sexes. In present study, we found that female trees were sensitive to previous October–November temperatures at high-altitude sites but to current February and April precipitation at low-altitude sites, whereas male trees were sensitive to current June temperature at high-altitude sites but to January precipitation at low-altitude sites (Fig. 4). So, our study on *P. cathayana* trees also confirmed the sensitivity of tree-ring variability to climate is sex and altitude dependent.

In conclusion, our results showed that the tree-ring growth of *P. cathayana* was increased during the period of 1982–2011. Mean ring width and mean BAI were both significantly higher in males than in females at high altitude, whereas no significant sexual differences were found at low altitude. Female trees were sensitive to previous October–November temperatures at high altitude but to current February and April precipitation at low altitude, whereas male trees were sensitive to current June temperature at high altitude but to January precipitation at low altitude. Our findings provide direct evidence that the response of tree-ring growth to climate is sex dependent, and could be changed with altitude elevation.

## FUNDING

This research was supported by the National Natural Science Foundation of China (31170389 and 31370596) and the Innovative Team Foundation of the Sichuan Provincial Department of Education (14TD0015).

## ACKNOWLEDGEMENTS

We thank Mr. Xiaofeng Li, Mr. Chengming Li, Dr. Hongyan Qiu, Dr. Jianping Duan, Dr. Lixin Lv, Dr. Pei Xing and Dr. Hanxue Liang for their help with both field and laboratory work. Thanks also to the administrators of Xiaowutai Mountain Nature Reserve for their support and to the Institute of Botany of the Chinese Academy of Sciences for supplying the Lintab 5 measuring system.

*Conflict of interest statement.* None declared.

## REFERENCES

- Ariel HM, Alejandro RJF (2016) Sex-related climate sensitivity of *Araucaria araucana* Patagonian forest-steppe ecotone. *Forest Ecol Manag* **362**:130–41.
- Ashman T (1994) A dynamic perspective on the physiological cost of reproduction in plants. *Am Nat* **144**:300–16.
- Biondi F, Qeadan F (2008) A theory-driven approach to tree-ring standardization: defining the biological trend from expected basal area increment. *Tree Ring Res* **64**:81–96.
- Biondi F, Waikul K (2004) DendroClim2002: a C++ program for statistical calibration of climate signals in tree-ring chronologies. *Comput Geosci* **30**:303–11.
- Black BA, Colbert JJ, Pederson N (2008) Relationships between radial growth rates and lifespan within North American tree species. *Ecoscience* **15**:349–57.
- Bloom AJ, Chapin FS III, Mooney HA (1985) Resource limitation in plants—an economic analogy. *Annu Rev Ecol Syst* **16**:363–92.
- Bräuning A, Mantwill B (2004) Summer temperature and summer monsoon history on the Tibetan plateau during the last 400 years recorded by tree rings. *Geophys Res Lett* **31**:L24205.
- Brooks JR, Flanagan LB, Ehleringer JR (1998) Responses of boreal conifers to climate fluctuations: indications from tree-ring widths and carbon isotope analyses. *Can J For Res* **28**:524–33.
- Briffa KR, Schweingruber FH, Jones PD, *et al.* (1998) Reduced sensitivity of recent tree-growth to temperature at high northern latitudes. *Nature* **391**:678–82.
- Büntgen U, Raible CC, Frank D, *et al.* (2011) Causes and consequences of past and projected Scandinavian summer temperatures, 500–2100 AD. *PLOS ONE* **6**:e25133.
- Cedro A, Iszkulo G (2011) Do females differ from males of European Yew (*Taxus baccata* L.) in dendrochronological analysis? *Tree Ring Res* **67**:3–11.
- Charnov EL (1982) *The Theory of Sex Allocation*. Princeton, NJ: Princeton University Press.
- Chen F, Chen L, Zhao H, *et al.* (2010) Sex-specific responses and tolerances of *Populus cathayana* to salinity. *Physiol Plant* **140**:163–73.
- Chen L, Dong T, Duan B (2014) Sex-specific carbon and nitrogen partitioning under N deposition in *Populus cathayana*. *Trees* **28**:793–806.
- Chen M, Huang Y, Liu G, *et al.* (2016) Effects of enhanced UV-B radiation on morphology, physiology, biomass, leaf anatomy and ultrastructure in male and female mulberry (*Morus alba*) saplings. *Environ Exper Bot* **129**:85–93.
- Chmura DJ, Anderson PD, Howe GT, *et al.* (2011) Forest responses to climate change in the northwestern United State: ecophysiological foundation for adaptive management. *Forest Ecol Manag* **261**:1121–42.
- Cipollini ML, Whigham DF (1994) Sexual dimorphism and cost of reproduction in the dioecious shrub *Lindera benzoin* (Lauraceae). *Am J Bot* **81**:65–75.
- Cook ER, Holmes RL (1996) Guide for computer program ARSTAN. In Grissino-Mayer HD, Holmes RL, Fritts HC (eds). *The International Tree-Ring Data Bank Program Library Version 2.0 User's Manual*. Tucson, AZ: Laboratory of Tree-Ring Research, University of Arizona, 75–87.
- Cook ER, Kairiukstis LA (1990) *Methods of Dendrochronology: Applications in the Environmental Sciences*. New York, NY: Springer, 55–63.
- D'Arrigo RD, Jacoby GC, Free RM (1992) Tree-ring width and maximum latewood density at the North American tree line: parameters of climatic change. *Can J For Res* **22**:1290–6.
- D'Arrigo RD, Schuster WS, Lawrence DM, *et al.* (2001) Climate-growth relationships of eastern hemlock and chestnut oak from Black Rock Forest in the highlands of southeastern New York. *Tree Ring Res* **57**:183–90.
- Delph LF (1990) Sex-differential resource allocation patterns in the subdioecious shrub *Hebe subalpina*. *Ecology* **71**:1342–51.
- Dong T, Li J, Liao Y, *et al.* (2017) Root-mediated sex recognition in a dioecious tree. *Sci Rep* **7**:801.
- Esper J, Cook ER, Schweingruber FH (2002) Low-frequency signals in long tree-ring chronologies for reconstructing past temperature variability. *Science* **295**:2250–3.

- Falster DS, Warton DI, Wright IJ (2006) *SMATR: Standardised Major Axis Tests & Routines*. Version 2.0, Copyright 2006. <https://github.com/dfalster/smatr/>.
- Fan ZX, Bräuning A, Yang B, *et al.* (2009) Tree ring density-based summer temperature reconstruction for the central Hengduan Mountains in southern China. *Glob Planet Change* **65**:1–11.
- Fang K, Gou X, Chen F, *et al.* (2010) Tree growth and time-varying climate response along altitudinal transects in central China. *Eur J Forest Res* **129**:1181–9.
- Faust M, Erez A, Rowland LJ, *et al.* (1997) Bud dormancy in perennial fruit trees: physiological basis for dormancy induction, maintenance, and release. *HortScience* **32**:623–9.
- Frank D, Esper J (2005) Characterization and climate response patterns of a high-elevation, multi-species tree-ring network in the European Alps. *Dendrochronologia* **22**:107–21.
- Gao L, Zhang C, Zhao X, *et al.* (2010) Gender-related climate response of radial growth in dioecious *Fraxinus mandshurica* trees. *Tree Ring Res* **66**:105–12.
- Gou X, Chen F, Yang M, *et al.* (2005) Climatic response of thick leaf spruce (*Picea crassifolia*) tree-ring width at different elevations over Qilian Mountains, northwestern China. *J Arid Environ* **61**: 513–24.
- Grace J, Norton DA (1990) Climate and growth of *Pinus sylvestris* at its upper altitudinal limit in Scotland: evidence from tree growth-rings. *J Ecol* **78**:601–10.
- Grant MC, Mitton JB (1979) Elevational gradients in adult sex ratios and sexual differentiation in vegetative growth rates of *populus tremuloides* michx. *Evolution* **33**:914–8.
- He J, Dong T, Huang K, *et al.* (2017) Sex-specific floral morphology, biomass, and phytohormones associated with altitude in dioecious *Populus cathayana* populations. *Ecol Evol* **7**:3976–86.
- He M, Yang B, Bräuning A (2013) Tree growth–climate relationships of *Juniperus tibetica* along an altitudinal gradient on the southern Tibetan Plateau. *Trees* **27**:429–39.
- Holmes RL (1983) Computer-assisted quality control in tree-ring dating and measurement. *Tree Ring Res* **43**:69–75.
- Iszkuło G, Boratyński A (2011) Initial period of sexual maturity determines the greater growth rate of male over female in the dioecious tree *Juniperus communis* subsp. *communis*. *Acta Oecol* **37**:99–102.
- Iszkuło G, Jasinska AK, Romo A, *et al.* (2011) The greater growth rate of male over female of the dioecious tree *Juniperus thurifera* only in worse habitat conditions. *Dendrobiology* **66**:15–24.
- Iszkuło G, Jasinska AK, Sobierajska K (2011) Dendroecological differences between *Taxus baccata* males and females in comparison with monoecious *Abies alba*. *Dendrobiology* **65**:55–61.
- Jin L, Yang SN, Liao WB, *et al.* (2016) Altitude underlies variation in the mating system, somatic condition, and investment in reproductive traits in male Asian grass frogs (*Fejervarya limnocharis*). *Behav Ecol Sociobiol* **70**:1197–208.
- Jones MH, MacDonald SE, Henry GH (1999) Sex- and habitat-specific responses of a high arctic willow, *Salix arctica*, to experimental climate change. *Oikos* **87**:129–38.
- Kienast F, Schweingruber FH, Bräker OU, *et al.* (1987) Tree-ring studies on conifers along ecological gradients and the potential of single-year analyses. *Can J For Res* **17**:683–96.
- Körner C (2007) The use of ‘altitude’ in ecological research. *Trends Ecol Evol* **22**:569–74.
- Körner C, Basler D (2010) Plant science. Phenology under global warming. *Science* **327**:1461–2.
- Lebourgeois F, Mérian P, Courdier F, *et al.* (2012) Instability of climate signal in tree-ring width in Mediterranean mountains: a multi-species analysis. *Trees* **26**: 715–29.
- Li L, Duan B, Deng D, *et al.* (2014) Soil salinity alters the sexual responses to elevated CO<sub>2</sub> and temperature in growth and leaf traits of a dioecious plant. *Can J For Res* **44**:1292–301.
- Liang E, Wang Y, Xu Y, *et al.* (2010) Growth variation in *Abies georgei* var. *smithii* along altitudinal gradients in the Sygera Mountains, southeastern Tibetan Plateau. *Trees* **24**:363–73.
- Liu H, Park Williams A, Allen CD, *et al.* (2013) Rapid warming accelerates tree growth decline in semi-arid forests of Inner Asia. *Glob Change Biol* **19**:2500–10.
- Liu J, Qin C, Kang S (2013) Growth response of *Sabina tibetica* to climate factors along an elevation gradient in south Tibet. *Dendrochronologia* **31**:255–65.
- Lloyd AH, Bunn AG, Berner L (2011) A latitudinal gradient in tree growth response to climate warming in the *Siberian taiga*. *Glob Chang Biol* **17**:1935–45.
- Luong TH, Jang KS, Lim HW, *et al.* (2013). Correlation of tree ring growths of four major species with climate changes in South Korea. *Forest Sci Technol* **9**:180–6.
- Lv LX, Zhang QB (2012) Asynchronous recruitment history of *Abies spectabilis* along an altitudinal gradient in the Mt. Everest region. *J Plant Ecol* **5**:147–56.
- Mai CL, Liu YH, Jin L, *et al.* (2017) Altitudinal variation in somatic condition and reproductive investment of male Yunnan pond frogs (*Dianrana pleuraden*). *Zool Anz* **266**:189–95.
- Nybakken L, Julkunen-Tiitto R (2013) Gender differences in *Salix myrsinifolia* at the pre-reproductive stage are little affected by simulated climatic change. *Physiol Plant* **147**:465–76.
- Obeso JR (2002) The costs of reproduction in plants. *New Phytol* **155**:320–48.
- Olano JM, García-Cervigón AI, Arzac A, *et al.* (2015) Intra-annual wood density fluctuations and tree-ring width patterns are sex- and site-dependent in the dioecious conifer *Juniperus thurifera* L. *Trees* **29**:1341–53.
- Peng J, Gou X, Chen F, *et al.* (2008) Altitudinal variability of climate-tree growth relationships along a consistent slope of Anyemaqen Mountains, northeastern Tibetan Plateau. *Dendrochronologia* **26**:87–96.
- Pitman ETG (1939) A note on normal correlation. *Biometrika* **31**:9–12.
- Randriamanana TR, Nissinen K, Moilanen J, *et al.* (2015) Long-term UV-B and temperature enhancements suggest that females of *Salix myrsinifolia* plants are more tolerant to UV-B than males. *Environ Exper Bot* **109**:296–305.
- Renner SS, Ricklefs RE (1995) Dioecy and its correlates in the flowering plants. *Am J Bot* **82**:596–606.
- Rolland C (1993) Tree-ring and climate relationships for *Abies alba* in the internal Alps. *Tree Ring Res* **53**:1–11.



- Rozas V, DeSoto L, Olano JM (2009) Sex-specific, age-dependent sensitivity of tree-ring growth to climate in the dioecious tree *Juniperus thurifera*. *New Phytol* **182**:687–97.
- Sánchez Vilas J, Pannell JR (2011) Sexual dimorphism in resource acquisition and deployment: both size and timing matter. *Ann Bot* **107**:119–26.
- Splechtina BE, Dobryns J, Klinka K (2000) Tree-ring characteristics of subalpine fir (*Abies lasiocarpa* (Hook.) Nutt.) in relation to elevation and climatic fluctuations. *Ann For Sci* **57**:89–100.
- Stocker T (ed) (2014) Climate change 2013: the physical science basis: Working Group I contribution to the Fifth assessment report of the Intergovernmental Panel on Climate Change. Cambridge: Cambridge University Press.
- Wang L, Duan J, Chen J, et al. (2010) Temperature reconstruction from tree-ring maximum density of *Balfour spruce* in eastern Tibet, China. *Int J Climatol* **30**:972–9.
- Wang T, Ren H, Ma K (2005) Climatic signals in tree ring of *Picea schrenkiana* along an altitudinal gradient in the central Tianshan Mountains, northwestern China. *Trees* **19**:736–42.
- Wang X, Curtis PS (2001) Gender-specific responses of *Populus tremuloides* to atmospheric CO<sub>2</sub> enrichment. *New Phytol* **150**:675–84.
- Wang XZ, Griffin KL (2003) Sex-specific physiological and growth responses to elevated atmospheric CO<sub>2</sub> in *Silene latifolia* Poir. *Glob Chang Biol* **9**:612–8.
- Warton DI, Weber NC (2002) Common slope tests for bivariate errors-in-variables models. *Biom J* **44**:161–74.
- Xu X, Zhao H, Zhang X, et al. (2010) Different growth sensitivity to enhanced UV-B radiation between male and female *Populus cathayana*. *Tree Physiol* **30**:1489–98.
- Xu X, Yang F, Xiao X, et al. (2008) Sex-specific responses of *Populus cathayana* to drought and elevated temperatures. *Plant Cell Environ* **31**:850–60.
- Yang Y, He X, Xu X, et al. (2015) Scaling relationships among twig components are affected by sex in the dioecious tree *Populus cathayana*. *Trees* **29**:737–46.
- Yu P, Liu H, Cui H (2002) Vegetation and its relation with climate conditions near the timberline of Beitai, the Xiaowutai Mts., northern China. *Chin J Appl Ecol* **13**:523–8.
- Zhang G, Zhang Y, Dong J, et al. (2013) Green-up dates in the Tibetan Plateau have continuously advanced from 1982 to 2011. *Proc Natl Acad Sci* **110**:4309–14.
- Zhang QB, Hebda RJ (2004) Variation in radial growth patterns of *Pseudotsuga menziesii* on the central coast of British Columbia, Canada. *Can J For Res* **34**:1946–54.
- Zhang QB, Cheng G, Yao T, et al. (2003) A 2,326-year tree-ring record of climate variability on the northeastern Qinghai-Tibetan Plateau. *Geophys Res Lett* **30**:HLS 2.1–4.
- Zhang S, Jiang H, Peng S, et al. (2011) Sex-related differences in morphological, physiological, and ultrastructural responses of *Populus cathayana* to chilling. *J Exp Bot* **62**:675–86.
- Zhang S, Jiang H, Zhao HX, et al. (2014) Sexually different physiological responses of *Populus cathayana* to nitrogen and phosphorus deficiencies. *Tree Physiol* **34**: 343–54.
- Zhang S, Zhang Y, Cao Y, et al. (2016) Quantitative proteomic analysis reveals *Populus cathayana* females are more sensitive and respond more sophisticatedly to iron deficiency than males. *J Proteome Res* **15**:840–50.
- Zhang Y, Wilmking M (2010) Divergent growth responses and increasing temperature limitation of Qinghai spruce growth along an elevation gradient at the northeast Tibet Plateau. *Forest Ecol Manag* **260**:1076–82.
- Zhao H, Li Y, Zhang X, et al. (2012) Sex-related and stage-dependent source-to-sink transition in *Populus cathayana* grown at elevated CO<sub>2</sub> and elevated temperature. *Tree Physiol* **32**:1325–38.
